# Supplementary material for: Construction of a Quantitative Genomic Map, Identification and Expression Analysis of Candidate Genes for Agronomic and Disease-Related Traits in Brassica napus
Source: Front Plant Sci. 2022 Mar 11;13:862363. doi: 10.3389/fpls.2022.862363 (PMC8963808; doi:10.3389/fpls.2022.862363)
Supplement: Supplementary file 11 [file Table_11.XLSX]

## Sheet: Sheet1
Supplementary table 11. Expression level of the genes in different tissues of ZS11.
Note	Name	ZS11	cotyledon_0h	root	vegetative_rosette	upper_stem_peel	middle_stem_peel	lower_stem_peel	leaf_1	leaf_2	leaf_3	leaf_4	leaf_5	leaf_6	leaf_7	leaf_8	leaf_9	leaf_10	leaf_11	leaf_12	leaf_13	leaf_14	leaf_15	leaf_16	leaf_17	leaf_18	leaf_20	leaf_21	leaf_22	leaf_23	sepal	petal	filament	pollen	bud_2mm	bud_4mm	silique_2DAF	silique_4DAF	silique_6DAF	silique_8DAF	silique_10DAF	silique_12DAF	silique_wall_14DAF	silique_wall_16DAF	silique_wall_18DAF	silique_wall_20DAF	silique_wall_22DAF	silique_wall_24DAF	silique_wall_26DAF
Selected for qPCR and gene structural variation	FUS3	BnaA02G0339300ZS	0	0	0	0	0	0	0	0	0	0	0	0	0	0	0	0	0	0	0	0.52	0	0	0	0	0	0	0	0.12	0	0	0	0	0	0	0	0	0	0	0	0.04	0.02	0	0	0	0	0	0
	PRP4 KINASE B	BnaA06G0393200ZS	8.29	17.86	16.99	14.84	9.73	10.17	10.27	11.3	12.67	11.21	12.88	12.39	14.01	12.79	13.75	13.76	14.7	15.99	14.63	15.43	15.19	20.21	15.32	17.5	15.6	17.55	18.82	8.81	9.6	9.24	8.8	11.84	14.3	11.04	6.2	11.05	10.29	9.93	11.55	17.02	15.38	10.21	8.86	7.46	8.18	7.73	9.81
	KR	BnaA09G0431800ZS	19.13	21.08	13.38	8.21	9.15	9.03	7.79	6.52	7.9	7.93	7.08	7.47	7.34	6.13	6.86	5.86	5.62	5.5	6.22	7.04	5.18	5.14	4.84	5.04	4.69	5.92	1.94	17.55	15.99	49.78	23.3	3.56	2.97	3.61	0.02	34.92	31.71	31.41	27.56	28.64	20.07	18.92	11.01	9.87	12.69	11.31	10.87
	RCN1	BnaA08G0226800ZS	13.72	22.18	16.94	16.61	6.33	6.19	6.4	7.37	6.72	6.42	7.51	6.66	6.42	5.5	5.83	5.61	5.6	5.17	4.87	4.72	4.67	4.9	4.28	4.2	4.57	5.4	6.23	8.22	13.06	14.97	17.47	9.24	3.47	4.98	2.9	5.59	18.12	15.33	16.11	14.52	16.74	18.53	10.28	13.15	16.43	14.88	13.43
	KASI	BnaC09G0238900ZS	7.03	7.49	4.93	6.05	2.45	2.58	2.2	2.6	2.15	2.48	2.41	2.55	2.03	2.29	2.22	2.34	1.88	1.58	1.83	3.06	1.38	1.02	2.04	1.15	2.25	1.44	0.71	9.91	10.66	25.73	12.58	0.43	0.21	0.48	0.02	27.19	29.64	21.46	20.49	16.34	14.63	16.61	10.13	8.68	19.18	12.3	7.69
	KASIII	BnaA09G0154900ZS	13.35	12.82	11.42	11.18	8.31	7.57	7.76	8.95	7.32	6.83	6.93	7.52	6.82	6.31	6.12	6.3	5.57	5.68	5.27	5.66	5.39	4.85	4.88	4.94	5.32	5.73	3.17	9.7	11.14	37.79	28.8	2.55	1.72	2.79	0.16	26.65	27.4	20.84	21.17	17.84	16.58	14.88	7.01	8.99	10.72	9.68	9.26
	MCAT	BnaC03G0169200ZS	5.32	4.36	3.32	3.3	1.98	1.79	1.88	2.16	1.8	1.18	1.28	1.56	1.06	1.24	1.24	1.05	0.95	0.65	0.84	1.94	0.63	0.57	0.57	0.48	0.59	0.25	0.08	6.49	9.69	38.57	17.08	0.35	0.14	0.43	0.1	19.59	18.29	13.5	14.2	13.44	9.74	10.81	6.14	2.38	3.3	4	3.98
	FLC	BnaA03G0039200ZS	7.17	0	0	0.15	0.05	0.04	0.17	0.08	0.35	0.06	0.08	0.05	0.09	0.02	0.11	0.19	0.19	0.43	0.16	1.04	0.24	0.28	0.32	0.34	0.42	0.28	0.18	93.18	47.26	0.24	0.42	3.56	1.91	1.06	0	4.27	3.44	2.28	2.39	3.13	1.68	0.55	0.42	0.16	0.03	0.41	0.13
	FVE	BnaC09G0127500ZS	6.25	14.53	15.46	14.5	5.17	6.24	5.27	6.1	5.6	5.02	5.13	5.17	4.78	4.51	4.48	3.8	3.9	3.57	3.6	4.06	3.28	2.91	3.33	2.98	3.35	3.4	2.52	6.14	6.28	46.14	20.52	4.29	7.02	6.78	1.03	55.61	46.29	36	25.78	20.01	19.34	13.41	8.48	10.08	10.44	8.43	8.87
	EMB	BnaC02G0376400ZS	59.48	80.77	47.24	50.07	25.32	24.67	27.17	25.11	23.21	23.74	21.79	23.64	19.68	15.94	22.01	20.13	16.7	17.88	18.31	17.51	20.15	16.47	15.74	19.83	21.88	22.86	12.83	52.65	56.37	151.65	54.72	6.35	4.58	4.23	0.17	245.6	222.67	144.4	105.17	86.23	90.62	84.85	42.32	39	55.21	49.19	38.14
	PHT2	BnaA01G0147600ZS	0.27	0	0	0	0	0	0	0	0.01	0	0	0	0	0	0.01	0	0	0	0	0	0.02	0	0	0	0	0	0	0	0	0.08	0	0	0	0.01	0.02	0	0	0	0	0.02	0.02	0	0.05	0	0	0	0
	TIP2	BnaA06G0389600ZS	1290.17	577.16	257.12	113.13	374.1	341.26	329.22	333.78	312	268.12	320.82	246.8	274.05	249.16	229.28	202.36	174.23	134.18	158.94	85.98	69.25	61.58	123.98	67.5	96.27	48.53	29.86	877.61	1418	297.62	972.62	75.65	80.96	177.64	298.2	477.62	291.13	284.82	330.82	279.03	362.17	727.31	459.31	215.66	274.54	327.82	247.29
	Unk	BnaA06G0390600ZS	0.54	0.19	0.36	0.44	0.26	0.11	0.12	0.13	0.2	0.12	0.25	0	0.2	0.13	0.11	0.16	0.09	0.04	0.16	0.08	0	0.07	0.04	0.03	0.02	0.07	0	0.32	0.19	0.22	0.4	0.07	0	0	0	0.33	0.37	0.68	0.96	0.94	0.97	0.74	0.47	0.37	0.49	0.22	0.14
	LTA2	BnaA06G0393000ZS	0	0	0	0	0	0	0	0	0	0	0	0	0	0	0	0	0	0	0	0	0	0	0	0	0	0	0	0	0	0	0.29	0.01	0	0	0.01	0	0	0	0	0	0	0	0	0	0	0	0
	AAPPT	BnaA01G0345800ZS	0	0	0	0	0	0	0	0	0	0	0	0	0	0	0	0	0	0	0	0	0	0	0	0	0	0	0	0	0	0.16	0	0	0	0	0	0	0	0	0	0	0	0	0	0	0	0	0
	PP2A	BnaA09G0170900ZS	15.73	21.47	19.24	17.68	14.32	13.68	14.93	16.19	16.65	16.61	17.6	16.57	17.6	18.95	19.52	19.89	22.99	20.06	20.2	22.59	26.26	23.18	21.84	24.62	21.53	23.06	21.85	19.08	15.62	12.59	14.18	21.12	22.67	20.67	2.98	19.83	16.42	16.67	21.15	18.27	21.7	15.52	8.3	12.78	15.2	12	15.15
	GDSL	BnaC09G0194100ZS	0	0	0	0	0	0	0	0	0	0	0	0	0	0	0	0	0	0	0	0	0	0	0	0	0	0	0	0	0	0	0	0.02	0.02	0	0	0.05	0.02	0	0	0	0	0	0	0	0	0	0
	RLP46	BnaC03G0351600ZS	0.09	0.9	1.23	0.77	0.35	0.46	0.35	0.44	0.37	0.38	0.33	0.45	0.23	0.2	0.27	0.05	0.13	0.01	0.11	0.14	0.18	0.03	0.22	0.08	0.34	0.22	0.58	0.39	0.34	0.11	0.01	0.02	0	0.02	0	0.15	0.24	0.37	0.2	0.1	0.23	0.18	0.11	0.81	0.75	0.23	0.35
	Unk	BnaA09G0187000ZS	0.3	18.98	13.06	13.99	36.65	38.71	33.98	34.8	32.58	34.09	31.34	32.59	31.3	33.95	30.32	34.17	32.2	31.97	36.22	35.37	36.28	28.1	34.81	32.29	34.74	36.43	15.52	36.56	24.95	15.54	7.26	3.47	2.99	2.74	0.25	24.14	24.82	27.44	26.75	20.61	19.25	25.68	23.03	21.64	30.6	33.88	30.56
	PP	BnaA01G0382800ZS	6.42	4.26	5.1	4.56	7.2	7.33	7.59	8.19	8.33	8.28	8.43	8	8.39	8.35	8.64	7.89	8.69	8.7	8.23	8.72	7.25	8.16	7.56	7.56	8.36	7.53	7.86	6.26	4.85	8.01	9.81	2.9	3.25	2.53	2.62	2.2	4.7	5.5	4.67	4.32	4.35	3.67	8.06	4.56	3.3	3.93	3
	Unk	BnaC09G0217800ZS	N
	SEP3	BnaC05G0234000ZS	0	0	0.05	0.95	0.81	0.69	0.73	0.51	0.25	0.22	0.12	0.12	0.25	0.03	0.02	0.02	0.15	0.3	0.03	0.29	0.1	0.13	0.06	0.06	0.2	0.03	0.06	0.14	0.91	126.19	112.28	27.8	46.78	10.58	2.9	98.5	101.01	80.81	102.26	133.24	119.39	70.52	43.89	75.13	59.94	55.59	63.23
	Unk	BnaA09G0433500ZS	0	0	0	0	0	0	0	0	0	0	0	0	0	0	0	0	0	0	0	0	0	0	0	0	0	0	0	0	0	0	0.16	0.06	0	0.01	0	0.02	0.14	0.48	0.61	1.18	1.92	0	0	0	0	0	0
	Unk	BnaC03G0641000ZS	0.02	0.02	0	0.05	0.02	0.01	0.01	0.02	0.06	0.02	0.01	0.01	0.01	0.02	0	0.03	0.01	0.02	0.02	0.01	0.03	0.01	0.02	0.02	0.02	0.01	0.05	0.01	0	0	0.06	0.04	0.05	0.05	0.08	0.01	0.01	0.02	0.03	0.04	0	0.03	0.08	0.01	0.03	0.01	0.03
	PFT1	BnaA09G0438500ZS	18.78	19.43	20.46	17.81	13.14	13.14	14.61	13.95	15.11	15.03	15.24	15.01	16.74	15.4	17.25	16.18	17.39	17.62	17.58	17.31	17.04	19.01	16.7	17.12	17.15	18.05	21.16	5.98	7.98	25.6	16.72	25.89	30.52	24.83	8.41	20.09	16.97	19.19	15.76	18.34	19.66	12.16	8.76	13.12	12.99	11.38	12.25
	FBR12	BnaA09G0442600ZS	389.57	218.81	219.09	175.53	92.12	102.91	126.93	121.82	119.76	124.05	128.1	123.05	123.3	122.58	143.56	119.57	126.38	132.52	131.69	136.56	169.68	166.14	145.02	182.18	165.27	183.19	190	245.53	229.55	259.74	139.16	302.65	384.98	341.82	15.06	334.06	290.56	230.44	224.04	185.31	200.81	178.84	174.47	122.94	170.22	200.6	176.32
	CUL3A	BnaA09G0444200ZS	21.38	26.95	25.22	21.81	16.61	16.13	17.27	17.94	18.47	17.44	18.52	17.89	18.72	17.91	18.32	17.11	17.09	17.82	17.96	17.68	18.19	19.69	16.6	19.19	18.44	19.18	19.67	13.35	14.94	21.09	20.54	24.79	29.87	30.79	11.61	22.13	20.19	22.57	21.3	26.34	23.79	17.84	14.5	14.51	13.49	14	14.14
	SALM	BnaA09G0444400ZS	21.61	21.23	19.64	19.63	9.69	8.66	9.47	9.07	9.16	9.05	9.34	9.41	9.38	8.71	9.33	8.69	8.72	9.17	8.17	9.02	9.25	8.83	8.54	8.99	8.22	9.26	6.41	16.69	21.08	20.49	20.77	6.06	7.6	9.05	7.58	17.27	26.72	29.25	32.67	34.21	31.94	24.73	13.08	14.66	16.44	14.69	14.26
	Unk	BnaC02G0358400ZS	N
	Unk	BnaC09G0601600ZS	0	0.01	0	0	0	0	0	0	0	0	0	0	0	0	0	0	0	0	0	0	0	0	0	0	0	0	0	0	0	0	0	0	0	0	0	0	0	0	0	0	0	0	0	0	0	0	0
	Unk	BnaA09G0444500ZS	0.47	0	0	0	0	0	0	0	0	0	0	0	0	0	0	0	0	0	0	0	0.02	0	0	0	0	0	0	0	0	0.01	0	0	0	0.02	0	0	0.02	0	0	0	0.02	0	0	0	0	0	0
	E2F1	BnaC03G0106500ZS	1.96	2.13	2.3	1.52	0.95	0.92	1.04	1.06	1.09	1.37	1.25	1.43	1.27	1.28	1.54	1.53	1.71	1.6	1.81	1.86	1.4	2.23	1.76	1.3	1.33	1.59	2.53	0.56	1.33	2.81	2.4	2.31	0.99	0.73	0.89	2.84	2.88	2.42	2.09	2.73	2.38	1.03	1.26	1.08	1.61	1.29	2
	PHYA	BnaA06G0057900ZS	24.51	15.14	13.01	10.11	6.33	6.79	7.33	7.55	7.71	8.13	9.01	8.4	8.9	9.3	10.73	9.42	10.14	10.47	10.74	12.62	15.07	13.21	11.25	14.6	12.93	15.46	11.81	4.92	8.83	17.51	8.43	5.47	12.82	15.8	0.39	3.14	7.66	8.64	7.05	7.67	9.27	4.59	5.17	9.29	7.12	4.6	5.51
	AP2	BnaC01G0019400ZS	26.76	9.35	8.27	4.21	0.76	0.75	0.83	1	0.88	0.94	0.97	0.96	1.34	0.92	1.5	1.38	1.61	1.72	1.55	2.39	2.29	1.87	1.62	2.87	1.95	2.59	4.39	7.23	5.48	13.07	13.46	9.71	35.25	16.04	0.63	40.14	18.98	21.45	20.34	19.88	23.66	5.37	2.37	5.18	5.96	4.01	5.53
	AUX1	BnaA04G0245300ZS	36.7	32.56	117.82	122.31	16.83	17.86	13.61	16.01	19.03	13.81	24.04	18.15	20.86	17	23.25	18.16	14.65	13.72	13.66	12.21	8.17	13.22	10.3	8.88	5.94	7.4	3.08	9.78	30.65	7.5	37.33	22.74	15.78	21.57	0.17	15	7.37	7.32	8.71	7.77	11.4	14.02	10.84	34.21	39.97	30.9	28.51
	ACP4	BnaA01G0145800ZS	0	8.17	10.87	12.29	105.64	109.94	103.52	88.54	83.59	80.96	70.43	74.2	69.51	86.49	60.95	71.44	66.33	57.82	69.06	58.29	62.81	49.57	74.77	55.79	59.56	50.94	27.72	518.3	294.38	96.56	39.87	7.24	6.15	5.08	1.44	122.96	149.63	148.43	108.09	71.84	58.59	95.46	40.86	50.14	68.73	65.34	42.35
	CO	BnaA10G0206200ZS	0.03	0.07	0.4	0	1.36	1.85	2.23	2.7	2.55	2.6	1.87	2.34	1.45	1.83	1.08	0.94	0.58	0.36	0.92	0.7	0.36	0.36	1.08	0.15	0.49	0.26	0.05	0.02	0.17	0.15	0.28	0.02	0	0	0	1.66	0.3	0.17	0.12	0.07	0.24	0.19	0.1	0.02	0.04	0.24	0.13
	AGL20	BnaC04G0060400ZS	8.56	258.28	224.98	207.72	312.52	300.31	320.94	342.65	363.21	383.4	373.44	383.24	405.82	369.57	393.26	398.23	440.34	459.33	427.39	467.82	357.5	538.46	413.54	403.78	326.68	328.32	212.98	9.25	9.84	10.06	3.15	24.52	23.5	26.16	3.44	3.72	3.93	4.3	5.99	5.21	8.36	9.44	9.63	22.23	23.11	18.01	22.54
	COP1	BnaA04G0211800ZS	0	0	0	0	0	0	0	0	0	0	0	0	0	0	0	0	0.05	0	0	0	0	0	0	0	0	0.03	0	0	0	0.02	0	0.11	0.17	0.11	0	0	0	0	0	0	0	0	0	0	0	0	0
	FT	BnaC04G0181400ZS	0	0.18	2.19	7.06	3.44	2.69	2.54	2.29	3.65	3.65	2.7	2.29	3.85	3.18	2.08	3.69	3.74	2.09	3.22	3.21	1.16	3.33	1.72	1.45	1.26	2.23	2.56	0	0.07	0.09	0.08	8.46	0.14	0.52	0	0.05	0.02	0	0	0	0.03	0	0.17	0.54	0.38	0.27	0.3
	DGAT	BnaC01G0259700ZS	7.52	8.35	5.26	7.37	14.07	14.01	15.5	17.07	16.52	16.35	15.72	17.11	15.77	20.45	18.22	18.02	18.62	18.13	20.27	21.39	29.01	23.7	21.34	27.02	20.99	26.17	25.6	6.76	7.13	71.98	8.8	24.18	21.45	25.65	7.15	6.53	9.21	9.41	9.9	10.53	9.04	7.5	19.35	9.63	7.2	9.96	11.06
	FLD	BnaA03G0318500ZS	7.18	7.72	6.58	5.8	4.45	4.34	4.69	4.31	4.95	4.83	5.05	4.95	5.1	4.8	5	5.32	4.62	5.17	5.41	4.64	5.34	6.23	4.03	5.7	5.28	5.44	5.45	3	4.2	7.29	5.12	3.89	3.84	3.5	1.7	3.43	6.85	6.35	6.11	6.26	5.51	4.55	2.75	3.21	2.81	2.79	3.39
	FRI	BnaC03G0164100ZS	3.38	7.56	5.55	4.81	4.32	4.6	4.82	4.06	5.38	6.58	5.92	5.66	6.53	5.47	6.56	6.35	6.97	7.47	6.96	7.27	6.87	9.54	6.48	7.13	8.47	8.71	8.9	2.04	1.83	8.94	19.13	11.54	10.25	9.49	37.79	5.84	4.43	4.66	4.08	3.96	5.05	3.33	2.3	3.12	2.96	3.12	3.32
	GAI/SLR1	BnaA02G0158200ZS	0	0	0	0	0	0	0	0	0	0	0	0.08	0	0	0	0.03	0	0	0	0	0.06	0	0	0.04	0	0.03	0.06	0.03	0	0	0	0	0	0	0	0	0	0	0	0	0	0	0	0	0	0	0
	GI	BnaC05G0198400ZS	7.24	121.99	67.24	52.3	22.17	22.31	23.75	25.31	27.98	27.24	30.02	31.09	34.22	31.65	35.68	35.68	39.91	39.17	39.53	38.84	48.12	42.95	39.33	51.03	53.04	53.91	55.84	2.5	0.75	13.72	21.46	79.95	66.96	53.49	4.35	46.14	29.79	29.16	48.47	50.82	57.43	43.96	21.06	48.74	39.43	33.94	46.93
	KASII	BnaA02G0213600ZS	0	0	0	0.01	0	0	0	0	0	0	0	0	0	0	0	0	0	0.01	0	0.11	0	0	0	0.01	0	0	0.04	0	0	16.17	0	0	0.01	0.06	0	0	0	0.02	0	0.02	0.06	0	0	0	0	0	0
	LPAAT	BnaC07G0498300ZS	9.66	10.17	11.27	8.71	11.17	10.87	10.51	12.16	9.43	11.05	10.58	11.18	10.87	10.79	9.91	9.69	10.74	9.78	9.7	10.09	12.2	10.86	8.72	11.22	10.9	9.85	8.76	24.02	17.86	14.82	12.88	13.34	13.7	12.53	3.04	15.25	17.35	19.19	21.96	16.75	16.26	13.09	10.52	9.07	13.66	14.18	13.7
	PHYB	BnaC05G0432200ZS	5.54	13.05	20.85	25.57	25.65	25.37	26.52	24.3	24.61	23.63	25.5	23.16	26.18	25.88	23.54	23.26	25.19	24.89	21.97	20.93	22.65	21.66	17.27	23.85	19.78	21.82	12.7	7.11	7.39	9.73	10.89	6.97	8.49	9	2.05	8.5	10.76	14.22	14.84	16.2	14.92	19.32	8.06	10.77	7.37	9.48	11.96
	RLK	BnaA04G0258300ZS	13.2	10.95	11.28	12.23	29.26	29.9	31.93	27.84	25.62	26.44	26.76	24.2	26.11	27.16	25.57	26.97	27.19	27.5	26.93	24.19	30.86	22.42	24.65	27.55	29.4	32.59	21.3	68.66	59.43	37.21	18.67	12.71	13.52	9.34	0.66	54.95	70.23	65.94	59.4	42.28	36.39	46.03	26.15	22.7	32.6	38.67	35.52
	SVP	BnaA04G0147200ZS	13.35	32.11	22.6	19.14	24.74	23.13	24.88	25.77	25.48	24.65	26.91	23.85	27.95	26.14	25.28	26.83	25.27	26.83	25.13	25.37	24.13	28.69	23.22	24.04	17.74	21.03	16.39	24.65	18.59	1.75	0.69	2	1.73	1.69	0	3.43	2.55	2.13	0.8	1.01	0.6	0	0	0.03	0.02	0.09	0
	TFL1	BnaA02G0014100ZS	0.07	0	0	0	0.03	0.05	0	0	0	0	0	0	0.11	0	0	0	0	0	0.04	0	0	0	0	0	0	0	0	0	0.04	0.22	0.95	0.03	0	0	0	0.14	0	0.04	0.76	1.48	3.24	0	0	0.04	0	0	0
	TFL2	BnaA10G0192800ZS	10.5	8.22	7.88	7.14	4.48	5.65	4.58	5.1	5.11	6.3	5.8	5.47	6.78	5.58	6.35	6.02	6.63	6.33	7.02	6.75	7.19	8.1	6.16	7.52	7.5	7.12	8.42	4.99	4.9	8.38	4.64	9.42	12.37	9.55	1.87	11.16	9.38	8.58	7.85	8.97	10.44	6.41	6.7	6.1	6.96	5.99	6.51
[truncated: 43 more columns]
